# Supplementary material
Source: publisher figshare collection journal article supplement (https://gsapubs.figshare.com/ndownloader/files/31346707)
Supplement: Supplementary file 1 [file 31346707]

## Sheet: Table S1
Table S1. Experimental run conditions and the resulting phases with the phase proportions after Borisova et al. (2021) and the bulk-rock oxygen isotope composition
№	Run*	Pressure	Temperature	Time	Percentage of the starting components (wt%)		R	Resulting experimental phases	Resulting oxygen fugacity QFM$
		(GPa)	(°C)	(hours)	Serpentinite$$	Basalt*	melt-to-rock ratio	Phase proportion in wt%	[X FeIII XANES]	δ18OVSMOW bulk-rock $$	δ18OVSMOW expected bulk $$	δ18OVSMOW model zircon at 700 - 750°C $$
	SERP									9,65 ± 0,38
	BAS									5,8 ± 0,02
Mixed runs on serpentinite-basalt reaction
1	SB1	0.2	1250	2	19.95	80.05	4	Ol (39.6) + Cpx (22.3) + Chr (6.8) + Lint (34.0) + F (3.3)	QFM (+2.8)		6.56808	7.56808
2	SB4	0.2	1250	2	49.89	50.11	1	Ol + Cpx + Chr + Lint + F	-		7.72077	8.72077
3	SB7	0.2	1250	2	80.01	19.99	0.25	Ol (59.2) + Chr (6.5) + Lint (33.5) + F (5.9)	QFM (+4.4)		8.88039	9.88039
4	SBbis3	0.2	1250	5	19.95	80.05	4	Ol + L bas + F	-		6.56808	7.56808
5	SBbis1	0.2	1250	5	49.89	50.11	1	Ol (37.9) + Cpx (19.3) + Chr (6.7) + Lint (39.9) + F (2.1)	QFM (+2.5)		7.72077	8.72077
6	SBbis2	0.2	1250	5	80.01	19.99	0.25	Ol (59.4) + Chr (6.0) + Lint (33.4) + F (6.1)	QFM (+2.8)		8.88039	9.88039
7	SBter1	0.2	1250	48	19.95	80.05	4	L bas + F	-		6.56808	7.56808
8	SBter2	0.2	1250	48	49.89	50.11	1	Ol (36.0) + Cpx (22.0) + Chr (7.1) + Lint (38.9) + F (2.1)	-		7.72077	8.72077
9	SBter3	0.2	1250	48	80.01	19.99	0.25	Ol (57.5) + Chr (6.0) + Lint (35.0) + F (6.5)	QFM (+2.4)		8.88039	9.88039
Hybrid runs on serpentinite-basalt reaction
10	P37	0.2	1250	0.5	28.2	71.8	2.5	L bas (72.8) + L int (0.4) + Ol (17.0) + Opx (6.8) + Cpx + ChrMgt (0.0) + F (3.0)	-		6.8857	7.8857
11	P32	0.2	1250	2.5	17.7	82.3	4.6	L bas (72.7)+ L int (8.7) + Ol (10) + Opx (7) + Chr (0.0) + F (1.6)	-		6.48145	7.48145
12	P35	0.2	1250	5	18.8	81.2	4.3	L bas + L int + Ol + Opx + Chr + ChrMgt + Amph + F	QFM (+1.8)		6.5238	7.5238
13	P33	0.2	1250	48	19.8	80.2	4.1	L bas (57.1) + L int (15.4) + Ol (13.1) + Opx* (0.0) + Chr (6.0) + Amph (6.6) + F (1.7)	-		6.5623	7.5623
14	P42	0.2	1250	120	17.6	82.4	4.7	L bas (~58) + L int (~27.8) + Ol (12.8) + ChrMgt (0.0) + F (1.4)**	-		6.4776	7.4776
* SERP - starting serpentinite; BAS - starting basalt; L int - interstitial felsic glass; L bas - hydrous basaltic glass; Serp – serpentine minerals; Ol - olivine; Opx - orthopyroxene; Opx* - ferrosilite; Cpx- diopside; Amph - amphibole; Chr - chromite; ChrMgt - chromiferous magnetite; All experimental data are after Borisova et al. (2021).
Mgt - magnetite; F - aqueous fluid bubble(s).
$ QFM = oxygen fugacity expressed in log units compared to the quartz-fayalite magnetite (QFM) mineral redox buffer as well as based on the X FeIII XANES data.
[X Fe III] XANES – molar fraction of Fe III compared to the bulk Fe in the sample measured by XANES.
Bracketed N number is the number of olivine-glass pairs.
$$ The bulk-rock serpentinite δ18OVSMOW with 1 sigma error compared to the mean value (3 bulk-rock analyses of the starting serpentinite have been performed by laser fluorination) in University of Oregon (USA).

## Sheet: Table S2
Table S2. Major and trace element composition of the interstitial glasses from the 0.2 GPa serpentinite-basalt reaction experiments (LA-ICP-MS data) and the calculated model zircon composition																																																Tizrc*	Yzrc*
Oxide/Reference:		Na2O	MgO	Al2O3	SiO2	P2O5	K2O	CaO	TiO2	MnO	FeO	Cr2O3	Total*	Mg#	ASI	Zr/Hf	Ti	Li	B	Cr	Ni	Rb	Sr	Y	Zr	Nb	Ba	La	Ce	Pr	Nd	Sm	Eu	Gd	Tb	Dy	Ho	Er	Tm	Yb	Lu	Hf	Ta	Pb	Th	U	P	FW2007	C2018
Units/Partitioning:		(wt%)	(wt%)	(wt%)	(wt%)	(wt%)	(wt%)	(wt%)	(wt%)	(wt%)	(wt%)	(wt%)	(wt%)	100 Mg/(Mg+Fe)	index	(ppm)	(ppm)	(ppm)	(ppm)	(ppm)	(ppm)	(ppm)	(ppm)	(ppm)	(ppm)	(ppm)	(ppm)	(ppm)	(ppm)	(ppm)	(ppm)	(ppm)	(ppm)	(ppm)	(ppm)	(ppm)	(ppm)	(ppm)	(ppm)	(ppm)	(ppm)	(ppm)	(ppm)	(ppm)	(ppm)	(ppm)	(ppm)	at 700°C	71.3
P32	P32-4-3$	3.32716	5.46092	14.2014	57.4571	0.315147	0.217407	10.1723	1.3399	0.138316	6.37028	0.0679221	99	60.4445	0.949544	35.2684	8030.67	4.59689	31.6058	464.728	10.1	7.10282	151.025	29.1799	101.019	9.91442	88.3085	7.32235	18.0446	2.72706	13.8407	3.814	1.12635	4.55215	1.06362	5.97059	1.14979	2.96835	0.629138	2.41117	0.520877	2.86428	1.7112	0.929861	0.945641	0.327798	1375.39	6.01	2080.53
P33	P33-down-1$	3.69892	8.90324	11.0737	56.4648	0.405786	0.203362	9.01678	1.0823	0.171134	7.97999	-	99	66.5416	0.763601	110.63	6486.75	264.092	37.0342	-	332.144	9.07885	106.613	17.9108	68.5903	6.491	49.7572	4.52184	11.4939	1.04399	6.51071	3.36315	0.290853	1.52923	0.57733	1.95492	0.384623	0.439133	0.0685957	0.42891	0.326858	0.619996	1.79456	5.78261	0.11769	0.128662	1770.96	6.01	1277.04
P33	P33-down-2$	2.69141	5.53591	11.4561	63.2385	0.321797	0.229186	6.24173	0.995223	0.14839	8.1417	0.0741209	99	54.7928	1.1069	34.0094	5964.86	232.202	20.003	507.141	176.44	7.85087	131.623	18.7205	76.1353	10.1226	74.6136	6.21962	14.6569	2.03955	8.76233	3.01943	0.844364	3.47442	0.567157	5.19429	1.21021	2.24272	0.400493	1.93735	0.282176	2.23865	5.18956	2.17062	0.396268	0.512077	1404.41	6.01	1334.77
P33	P33-up-up-2$	3.85454	2.04354	15.0999	61.5607	0.364462	0.288779	8.27455	1.3278	0.140786	6.04498	0.0696691	99	37.6014	1.0652	34.3887	7958.15	291.723	10.0194	476.681	51.024	9.90979	164.845	27.3618	104.208	12.2009	81.6813	8.8053	18.8863	2.72146	12.2043	4.37374	1.36941	4.70512	0.65824	4.11568	1.40785	1.69969	0.520824	2.70313	0.453655	3.03029	7.22353	4.37475	0.71786	0.670482	1590.62	6.01	1950.9
P33	P33-down-5$	2.2306	9.66842	9.19684	61.4362	0.272605	0.201022	6.41665	0.866333	0.195598	8.51572	0.103746	99	66.9295	0.946151	114.455	5192.35	215.776	-	709.836	393.118	7.22159	72.3148	18.2423	61.2044	5.88999	47.6	3.98778	10.67	1.3	9.02909	4.40829	0.32416	2.60422	0.448259	4.26483	0.764274	1.65314	0.090335	1.65997	0.209803	0.534748	3.92201	1.73249	0.422841	0.304863	1189.73	6.01	1300.68
P33	P33-down-7$	2.94954	9.27928	11.7192	60.1578	0.300467	0.293703	5.91893	0.944092	0.159241	7.27776	0.0791091	99	69.445	1.11074	74.1752	5658.41	270.845	26.5059	541.27	395.267	10.1265	119.872	19.9071	78.8141	11.3115	77.57	5.74188	13.45	2.39	9.10423	2.5277	0.243499	2.34214	0.737611	4.35639	0.737183	0.538324	0.129628	1.60324	0.335335	1.06254	4.53017	6.26311	0.425221	0.0453035	1311.32	6.01	1419.38
P33	P33-down-8$	3.61979	1.23227	15.1486	67.175	0.287634	0.329449	5.78055	1.06205	0.114919	4.24972	0.0461713	99	34.0751	1.30972	34.4214	6365.4	292.92	14.9901	315.908		10.2377	158.964	21.9465	82.4923	11.7197	87.81	7.47753	18.73	2.49	11.3929	3.06259	0.657102	4.16535	0.690712	3.88202	0.771263	1.87093	0.308066	1.64734	0.17772	2.39654	5.10356	2.38123	0.490943	0.277869	1255.32	6.01	1564.78
P33	P33-up-6$	2.87468	4.31641	14.5358	59.8571	0.264001	0.2273	8.14426	1.17724	0.163914	7.4393	0.0845375	99	50.8423	1.17425	35.9318	7055.75	242.801	1.93684	578.412	143.217	6.18422	129.171	23.0729	92.9826	9.67092	72.34	6.65825	15.75	2.37	10.2546	3.97428	1.236	2.48314	0.771008	3.69986	0.967627	0.921714	0.636489	2.52603	0.373052	2.58776	5.89737	2.48589	0.816353	0.414791	1152.18	6.01	1645.1
P33	P33-up-up-3$	3.47565	3.25999	15.3654	60.2293	0.263713	0.278628	8.14348	1.30594	0.162038	6.51582	0.0697794	99	47.1416	1.14477	23.1728	7827.15	262.279	6.33872	477.436	79.4632	8.8	131.897	26.603	92.445	11.8305	62.58	6.96041	17.7	2.57	10.9601	3.41684	1.17675	3.55993	0.836015	3.54649	0.884101	3.79189	0.151316	2.97312	0.46992	3.98938	6.42647	3.99516	0.622816	0.299657	1150.92	6.01	1896.79
P33 average		3.17439	5.52988	12.9494	61.2649	0.310058	0.256429	7.24212	1.09512	0.157003	7.02062	0.0658916	99	53.4212	1.07767	57.648	6563.6	259.08	14.6035	450.835	224.382	8.67619	126.912	21.7206	82.109	9.90463	69.244	6.29657	15.1671	2.11563	9.7773	3.51825	0.767768	3.10794	0.660792	3.87681	0.890891	1.64469	0.288218	1.93489	0.328565	2.05749	5.0109	3.64823	0.501249	0.331713	1353.18	6.01	1548.68
P33 STD		0.572121	3.37669	2.36517	3.07671	0.0514476	0.0474151	1.27676	0.165495	0.0235299	1.39071	0.0311288	2.51932e-14	13.543	0.162885	37.0456	991.891	27.3786	12.7455	212.985	146.757	1.47589	29.1813	3.71181	14.0401	2.45321	14.6372	1.56084	3.16696	0.617953	1.80639	0.676544	0.457586	1.05089	0.125674	0.926395	0.312917	1.08381	0.213703	0.806563	0.104654	1.22373	1.66851	1.7259	0.217506	0.200751	224.532	9.49503e-16	264.652
P42	P42-up-14$	3.05	5.04	13.4	65.5221	0.396711	0.378795	7.19	1.65	0.10122	3.18	0.032918	99	73.8599	1.12006	35.3053	9889.26	221.734	20.8437	225.228	115.44	12.4287	167.268	33.4394	110.318	11.3547	81.29	6.31232	10.74	1.77	11.844	3.81135	0.213322	2.13742	0.488777	3.35722	1.0114	1.72639	0.124705	1.7035	0.347151	3.12467	1.31689	0	0.427554	0.24395	1731.36	6.01	2384.23
P42	P42-up-18$	3.38978	4.5	13.5408	65.1801	0.430397	0.343429	7.47385	1.31113	0.111082	3.71938	0.0510116	99	67.505	1.06266	37.6272	7858.26	173.745	4.78565	349.025	247.401	11.3331	125.769	25.5421	89.6583	5.75698	41.01	4.45837	9.07	0.52	10.252	0.745904	0.614771	2.17231	0.548265	1.54424	0.504024	0.319329	0.0533823	1.4501	0.0363994	2.38281	1.95177	0	0.283523	0	1878.38	6.01	1821.15
P42 average		3.21989	4.77	13.4704	65.3511	0.413554	0.361112	7.33193	1.48057	0.106151	3.44969	0.0419648	99	70.6825	1.00743	37.3074	6650.19	197.74	12.8147	287.126	181.421	11.8809	146.519	29.4908	99.9879	8.55583	61.15	5.38535	9.905	1.145	11.048	2.27862	0.414047	2.15486	0.518521	2.45073	0.757711	1.02286	0.0890436	1.5768	0.191775	2.75374	1.63433	0	0.355538	0.121975	1804.87	6.01	2102.69
P42 STD		0.24026	0.381838	0.099582	0.2418	0.0238193	0.0250075	0.200712	0.239615	0.00697389	0.381402	0.0127941	0	4.49358	0.381226	10.2301	2756.98	33.9335	11.3548	87.5383	93.3105	0.774692	29.3445	5.58425	14.6084	3.95816	28.4823	1.31094	1.18087	0.883883	1.12568	2.16759	0.283867	0.0246753	0.0420646	1.28197	0.358766	0.99494	0.0504326	0.179182	0.219734	0.524578	0.448928	0	0.101845	0.172499	103.954	0	398.157
SB bis2	SB-bis2-unten-1-4$	1.91223	6.77477	12.9242	69.1619	0.165828	0.16571	7.01314	0.665303	0.0978224	5.09946	0	99	70.3103	1.33232	43.0945	3987.49	20.304	44.2598		345.108	4.44915	81.0477	15.2214	55.5785	5.20212	50.9112	3.79822	10.386	1.72118	6.52404	1.50732	0.876919	2.75804	0.55955	3.5378	0.595272	0.759958	0.1188	0.882881	0.0349827	1.28969	1.92913	0	0.232946	0.122819	723.722	6.01	1085.29
SB ter3	SB-ter3-oben-1-1$	1.85047	10.2649	10.8644	64.2474	0.191572	0.161198	6.05869	0.796466	0.165825	4.3829	0.04634	99	80.6755	1.24501	92.4278	4773.61	332.104	48.6847	317.061	110.412	5.03907	96.9143	18.2108	63.2524	8.26457	43.553	3.79419	10.833	1.14173	8.3003	2.50795	1.00374	1.12112	0.433096	2.74126	0.685334	2.25953	0.14288	1.02225	0.107183	0.684344	3.84993	0	0.531237	0.457103	836.076	6.01	1298.43
SB ter3	SB-ter3-oben-1-2$	2.16436	4.87062	12.6344	68.2573	0.199097	0.169065	6.63223	0.861726	0.105835	3.08527	0.0423331	99	73.7812	1.29283	75.6967	5164.75	363.192	-	289.646		5.58291	110.719	24.2598	79.6203	8.90963	65.2884	4.88008	13.8629	1.71349	9.18841	1.50441	1.09737	4.53382	0.484998	2.21311	0.672427	3.18508	0.355988	1.85693	0.557658	1.05183	4.65533	0	0.473291	0.46084	868.915	6.01	1729.73
SB ter3	SB-ter3-oben-1-6$	1.67762	9.16126	11.2045	68.4834	0.156235	0.105881	4.57767	0.562075	0.0862615	2.97706	0.0382423	99	84.5808	1.59249	74.468	3368.79	313.119	23.7248	261.657	552.438	2.47085	82.423	14.3154	54.3262	7.45208	42.3061	4.49587	8.40665	1.52189	6.62002	2.29536	0.466138	2.37524	0.368353	2.56378	0.443533	1.079	0.22934	0.893	0.0321897	0.729524	2.58664	0	0.390677	0.276639	681.853	6.01	1020.69
SB ter3	SB-ter3-oben-1-9$	2.10115	1.2544	12.5062	71.4777	0.148015	0.190044	6.83434	0.993129	0.0976138	3.37541	0.0341064	99	39.8478	1.26643	46.016	5952.31	358.051	-	233.359		3.9623	98.4062	22.5741	77.4673	8.77091	54.1497	4.8171	13.5554	2.0128	9.63612	2.46752	0.570232	2.09778	0.666016	3.23222	0.924601	2.92982	0.302937	2.02406	0.44076	1.68349	4.93977	0	0.593419	0.305825	645.98	6.01	1609.53
SB ter3	SB-ter3-unten-1-3$	2.11682	5.94552	10.7797	69.1925	0.161619	0.146238	5.99408	0.76373	0.12974	3.75401	0.0389433	99	73.8437	1.18593	120.346	4577.41	319.154	39.6822	266.453	220.989	4.94699	104.329	20.7933	70.1853	8.53691	52.3012	5.12209	13.3945	1.48848	9.44943	1.47209	0.654269	2.11991	0.667592	4.33485	0.747833	1.84032	0.346849	1.99108	0.155867	0.583196	3.9375	0	0.573309	0.358305	705.352	6.01	1482.56
SB ter3	SB-ter3-unten-1-6$	1.94381	6.09188	9.7479	69.3149	0.173976	0.148476	5.01094	0.673307	0.146465	5.73718	0.0865417	99	65.431	1.23178	36.601	4035.46	353.389	31.5931	592.125	280.978	3.9947	87.2194	12.5727	49.1492	7.34692	51.2544	4.46552	9.6713	1.12629	7.70657		0.659919	4.14791	0.490401	1.96674	0.77575	0.574104	0.174704	3.09015	0.0936971	1.34284	2.58249	0	0.247557	0.291976	759.283	6.01	896.435
SB ter3	SB-ter3-unten-1-10$	2.59243	0.875865	13.616	70.5112	0.227933	0.202303	7.33638	1.04877	0.103875	2.46252	0.0366186	99	38.8011	1.22084	32.5076	6285.81	382.133	52.9213	250.547	78.2192	9.08483	149.879	30.0667	92.1371	11.7914	82.0478	6.60313	17.3704	2.32403	9.74111	2.73327	0.475702	4.56157	1.21762	4.93351	1.09841	3.2767	0.404232	3.60188	0.562501	2.83433	4.40354	0	0.625778	0.228794	994.766	6.01	2143.76
SB ter3	SB-ter3-oben-3-1$	1.74622	8.10275	10.6482	64.6084	0.159357	0.147331	6.03129	0.827529	0.133008	6.51907	0.0769423	99	68.9015	1.25052	32.8116	4959.78	321.806	43.8269	526.445	213.994	5.04032	100.453	18.6484	65.997	8.24436	54.4111	4.72199	11.2925	1.6294	8.49632	2.59426	0.798839	3.11248	0.503772	3.70878	0.718582	2.17696	0.247922	2.19942	0.271555	2.0114	4.73011	0	0.474448	0.497346	695.478	6.01	1329.63
SB ter3	SB-ter3-oben-3-10$	2.25109	2.57346	13.5698	66.8813	0.164104	0.192432	7.38762	1.01052	0.126746	4.78618	0.0568108	99	48.9392	1.27687	38.4835	6056.52	369.178	54.3229	388.704	18.4349	5.93265	122.659	24.4835	82.2471	10.6915	63.0622	5.90697	14.804	2.13569	10.1883	3.19555	1.12014	3.7882	0.619414	4.27231	0.899162	2.3471	0.406471	2.48784	0.395625	2.1372	5.41284	0	0.549306	0.572891	716.197	6.01	1745.67
SB ter3 average		2.04933	5.46007	11.7301	68.1082	0.175768	0.162552	6.20703	0.837473	0.121708	4.11996	0.0507643	99	63.8669	1.28971	57.1163	5050.11	345.792	32.7507	347.333	210.781	5.11718	105.889	20.6583	70.4869	8.88981	56.486	4.97855	12.5767	1.67709	8.81406	2.3463	0.760705	3.09534	0.605696	3.32962	0.77396	2.1854	0.290147	2.12962	0.290782	1.45091	4.12202	0	0.495447	0.383302	767.1	6.01	1472.94
SB ter3 STD		0.282147	3.38722	1.38698	2.4643	0.0256802	0.0299598	0.963536	0.161796	0.0254553	1.35537	0.0189296	8.70234e-15	17.1947	0.126941	31.0112	1031.98	24.7944	20.9906	129.518	176.265	1.81183	20.333	5.42504	13.8213	1.46029	12.2327	0.830835	2.77807	0.41755	1.13868	0.591475	0.257104	1.23339	0.251615	1.04053	0.185316	0.916218	0.0966667	0.872036	0.205101	0.773383	0.993983	0	0.11736	0.117594	112.076	9.42055e-16	386.805
Model KREEP 10%*																								29.1		7.23			16.8		12.4	3.75	1.33	4.34	0.75					2.91	0.445	2.65			0.63	0.79			3635.59
Average composition		2.64373	5.48359	12.5349	64.7817	0.255736	0.219987	6.93569	1.0126	0.133325	5.31494	0.0540887		60.6805	1.17374	55.3256	6069	266.912	24.4323	388.583	209.122	7.1799	118.734	22.0511	78.4679	9.11779	63.0403	5.5748	13.4652	1.84557	9.52408	2.83975	0.753326	3.06388	0.637991	3.59004	0.826345	1.8381	0.278243	1.95683	0.294522	1.86569	4.00449	1.43408	0.49327	0.323714	1116.11
Average STD		0.710089	2.95342	1.82265	4.39842	0.0913671	0.0730211	1.32672	0.269702	0.0296394	1.90559	0.0268684		14.9586	0.169656	30.8625	1616.46	101.735	18.5756	167.348	150.613	2.7384	28.4221	5.42941	16.9698	2.20084	15.804	1.37738	3.31227	0.610823	1.89486	1.00882	0.350849	1.09286	0.205938	1.13681	0.256352	1.02669	0.175954	0.793432	0.174727	1.00726	1.68259	2.0616	0.195272	0.169813	398.752
$ LA-ICP-MS data are after Borisova et al. (2021). The data are recalculated to the anhydrous basis (99 wt%).
$$To calculate zircon composition, we applied Ti in zircon contents after Ferry and Watson (2007) at 700°C (FW2007) and trace element partitioning after Claiborne et al. (2018) (C2018).
* - according to KREEP basalt 15386 after Neal & Kramer (2006) and starting basalt of Borisova et al. (2021).
[truncated: 20 more columns]

## Sheet: Table S3
Table S3. Resulting phases after rhyolite-MELTS modelling of the 0.2 GPa felsic melt crystallization
Sample		Average composition*
		Equilibrium crystallization
Interval of values		start	end
Temperature	°C	800	700
Pressure	GPa	0.2	0.2
log units relative to QFM		QFM+2	QFM+2
Orthopyroxene	T, °C	800	745
	wt%	13	0.6
	clinoenstatite	96.1	97.4
Clinopyroxene	T, °C	800	780
	wt%	4.6	9.8
	diopside	2.6	62
	clinoenstatite	2	7.4
	hedenbergite	13	14
	alumino-buffo	71	8.7
	buffonite	-	-
	essenite	1	5
	jadeite	2.8	3.1
Spinel	T, °C	800	700
	wt%	2.5	3.5
	chromite	2.7	2
	hercynite	-	-
	magnetite	78	84
	spinel	17	15
	ulvospinel	14	9
Amphibole	T, °C	775	700
	wt%	17	18
	cummingtonite	0.7	2.4
	grunerite	9	9
	tremolite	91	89
Plagioclase	T, °C	800	700
	wt%	22	43
	albite	49	52
	anorthite	50	47
	sanidine	0.1	1
Apatite	T, °C	785	700
	wt%	0.05	0.8
Biotite	T, °C	760	700
	wt%	0.6	3.1
	annite	0.2	0.2
	phlogopite	99.8	99.8
Quartz	T, °C	795	700
	wt%	6.6	29.7
Rhm-oxide***	T, °C	790	700
	wt%	1.6	2.3
	geikielite	22	19
	hematite	23	28
	ilmenite	49	35
	pyrophanite	4	16
	corundum	3	3
Muscovite**	T, °C	650	650
	wt%	0.96	0.96
K-feldspar**	T, °C	650	650
	wt%	0.9	0.1
	albite	20	24
	anorthite	0.8	0.7
	sanidine	79	76
Water	T, °C	800	700
	wt%	2.3	5.6
* Average composition of the felsic liquid is given in Supplementary Table S2; wt% is mass in grams per 100 g of the initial mass according to the rhyolite-MELTS 1.2.0 modeling.
Conditions and resulting phases are temperature of crystallization, mass, composition (mole fraction of endmember components or indexes Mg#=100Mg/(Mg+FeII), Cr#=100Cr/(Cr+Al).
** uniquely during fractional crystallization at 0.2 GPa and QFM+2 using rhyolite-MELTS 1.0.2. (among the fractionated solid phases). Among the fractionated solids are: Amph (19 wt%), Bi (0.56 wt%), Plag (76 wt%), Qtz (56 wt%), Spl (3 wt%), Ilm (3.5 wt%) and Apt (0.9 wt%).
$ Fo – forsterite molecule in olivine. T – temperature; P – pressure; fO2 – oxygen fugacity; QFM+2 – two logarithmic units above quartz-fayalite-magnetite mineral buffer.
*** Ilmenite crystallization suggests high aTiO2 above 0.5 into the system (Harrison et al., 2017).

## Sheet: Table S4
Table S4a. Modeling of zircon crystallization in the 0.2 GPa felsic melts
T,°C	C sat, ppm*
	M=1.4**	M=1.9	M=2.4	M=2.9	M=3.4	M(T)	M(T)$
600	32.7823	58.5504	104.573	186.772	333.582	1.28	28.5261
650	61.3685	109.607	195.761	349.637	624.466	1.28	53.4003
700	107.714	192.381	343.599	613.681	1096.06	1.345	101.067
750	178.943	319.6	570.817	1019.5	1820.87	1.41	181.049
800	283.543	506.418	904.483	1615.44	2885.24	1.475	309.343
850	431.244	770.219	1375.64	2456.95	4388.2	1.54	507.327
900	632.857	1130.31	2018.77	3605.6	6439.75	1.605	802.81
950	900.054	1607.53	2871.11	5127.92	9158.66	1.67	1231.17
1000	1245.14	2223.86	3971.9	7093.97	12670.1	1.735	1836.58
* C sat is calculated according to eqn. 1 and values of M from 1.4 to 3.4.
$ C sat is calculated according to eqn. 1 and values M(T) from eqn. 2, where M and M(T) are M factors.
Table S4b. Modeling of zircon crystallization in the 0.2 GPa felsic melts
T,°C	C sat, ppm*
	M=1.4**	M=1.9	M=2.4	M=2.9	M=3.4
600	12.0404	18.4169	28.1703	43.0891	65.9086
650	26.8018	40.9958	62.7068	95.9157	146.712
700	54.951	84.0525	128.566	196.653	300.799
750	105.03	160.652	245.732	375.869	574.926
800	188.987	289.072	442.162	676.327	1034.5
850	322.728	493.641	755.069	1154.95	1766.6
900	526.54	805.39	1231.92	1884.33	2882.25
950	825.363	1262.47	1931.06	2953.73	4518
1000	1248.9	1910.3	2921.97	4469.42	6836.39
* C sat is calculated according to eqn. 3 and values of M from 1.4 to 3.4.
**see Supplementary Material for more details on the calculation and references.

## Sheet: Table S5
Table S5a. Computation of oxygen isotopic composition of zircon in equilibrium with experimental olivine
Zrn-Ol calculator	Temperature	∆ 18OVSMOW Zrn-Ol*		P32 δ18OVSMOW	P33 δ18OVSMOW
	°C	‰		‰	‰
in situ analysis of olivine*	-	-		6,56 ± 0,94	6,23 ± 1,44
model zircon	750	0.98		7.54	7.21
model zircon	700	1.09		7.65	7.32
*The SIMS analyses have been performed in CRPG, Nancy (France); see Supplementary Material for more details on the calculation and references.
Zrn - zircon
Ol - olivine
Table S5b. Model of oxygen isotopic composition of zircon produced due to serpentinite protolith melting
Substance-H2O (Oxygen)	T (°C)	Dmin-H2O $	Rock 1	Rock 2	δ18OVSMOW Zrn at 750°C	δ18OVSMOW STD	Rock 3	δ18OVSMOW Zrn at 750°C	δ18OVSMOW STD
Serpentine: Mg3Si2O5(OH)4	50	15.2956	14.5456	10.1728	11.1728	0.5	12.7965	13.7965	0.5
	75	12.5488	11.7988	8.79942	9.79942	0.5	10.5991	11.5991	0.5
	100	10.2164	9.46644	7.63322	8.63322	0.5	8.73315	9.73315	0.5
	125	8.21215	7.46215	6.63107	7.63107	0.5	7.12972	8.12972	0.5
	150	6.47194	5.72194	5.76097	6.76097	0.5	5.73755	6.73755	0.5
	175	4.94732	4.19732	4.99866	5.99866	0.5	4.51785	5.51785	0.5
$ Calculated after Savin & Lee (1988). See Supplementary Material for more details.

## Sheet: G49354
Borisova, A.Y., et al., 2021, Hadean zircon formed due to hydrated ultramafic protocrust melting: Geology, https://doi.org/10.1130/G49354.1
